# Supplementary material
Source: MDPI journal article supplement (https://www.mdpi.com/2073-4433/12/6/767)
Supplement: s1 [file s1]

# Occurrence of Volatile and Semi-Volatile Organic Pollutants in the Russian Arctic Atmosphere: the International Siberian Shelf Study Expedition (ISSS-2020)

Dmitry S. Kosyakov <sup>1,\*</sup>, Irina S. Shavrina <sup>2</sup>, Nikolay V. Ul'yanovskii <sup>1</sup>, Dmitry E. Lakhmanov <sup>1</sup> and Albert T. Lebedev <sup>1,2,\*</sup>

<sup>1</sup>Laboratory of Environmental Analytical Chemistry, Core Facility Center "Arktika", Northern (Arctic) Federal University, Arkhangelsk, Russia; d.kosyakov@marfu.ru (D.S.K.), i.shavrina@narfu.ru (I.S.S.), d.lakhmanov@narfu.ru (D.E.L.), n.ulyanovsky@narfu.ru (N.V.U.)

<sup>2</sup>Department of Organic Chemistry, Lomonosov Moscow State University, Moscow, Russia; mocehops@ya.ru (A.T.L.)

\* Correspondence: d.kosyakov@marfu.ru (D.S.K.); mocehops@ya.ru (A.T.L.).

**Table S1.** Coordinates of sampling points, atmospheric conditions and dates of air collection

| Sam-<br>ple | N        | E         | T, °C | P, mbar | Date       |
|-------------|----------|-----------|-------|---------|------------|
| 1           | 65.12997 | 39.77980  | 0     | 1010    | 2020-11-01 |
| 2           | 66.74825 | 41.24093  | 1     | 1022    | 2020-10-29 |
| 3           | 68.31443 | 42.26230  | 7     | 1030    | 2020-09-28 |
| 4           | 69.03775 | 44.55755  | 8     | 1028    | 2020-09-28 |
| 5           | 70.72725 | 58.91977  | 6     | 1017    | 2020-09-29 |
| 6           | 73.07417 | 68.49302  | -4    | 1023    | 2020-10-27 |
| 7           | 73.17033 | 72.95966  | 2     | 1008    | 2020-10-01 |
| 8           | 73.89687 | 79.29628  | 0     | 1015    | 2020-10-03 |
| 9           | 74.52932 | 81.70145  | -3    | 1015    | 2020-10-25 |
| 10          | 77.10350 | 124.81520 | -1    | 992     | 2020-10-07 |
| 11          | 76.54045 | 128.65190 | -1    | 1000    | 2020-10-20 |
| 12          | 73.10122 | 130.30660 | 1     | 994     | 2020-10-18 |
| 13          | 72.98955 | 140.16710 | 1     | 990     | 2020-10-16 |
| 14          | 77.52217 | 143.42510 | -1    | 1005    | 2020-10-11 |
| 15          | 74.90207 | 160.91870 | -1    | 1016    | 2020-10-13 |
| 16          | 74.99010 | 160.98610 | -2    | 1018    | 2020-10-13 |

**Table S2.** Target VOCs, corresponding quantifier ions and limits of detection and quantification

| №                               | t <sub>r</sub> ,<br>min | Compounds                      | CAS #      | Formula                                       | m/z      | LOD     | LOD                 | LOQ |
|---------------------------------|-------------------------|--------------------------------|------------|-----------------------------------------------|----------|---------|---------------------|-----|
|                                 |                         |                                |            |                                               |          | ng/tube | ng/m <sup>3</sup> * |     |
| Halogenated alkanes and alkenes |                         |                                |            |                                               |          |         |                     |     |
| 1                               | 1.53                    | Allyl chloride                 | 107-05-1   | C <sub>3</sub> H <sub>5</sub> Cl              | 76.0074  | 0.16    | 80                  | 260 |
| 2                               | 1.64                    | Methylene chloride             | 75-09-2    | CH <sub>2</sub> Cl <sub>2</sub>               | 48.9840  | 0.045   | 22.5                | 75  |
| 3                               | 1.75                    | 1,1-Dichloroethene             | 75-35-4    | C <sub>2</sub> H <sub>2</sub> Cl <sub>2</sub> | 95.9528  | 0.04    | 20                  | 66  |
| 4                               | 1.81                    | 1,1-Dichloroethane             | 75-34-3    | C <sub>2</sub> H <sub>4</sub> Cl <sub>2</sub> | 62.9996  | 0.01    | 5                   | 17  |
| 5                               | 1.85                    | Chloroprene                    | 126-99-8   | C <sub>4</sub> H <sub>5</sub> Cl              | 88.0074  | 0.004   | 2                   | 7   |
| 6                               | 1.93                    | cis-1,2-Dichloroethene         | 156-59-2   | C <sub>2</sub> H <sub>2</sub> Cl <sub>2</sub> | 95.9528  | 0.02    | 10                  | 33  |
| 7                               | 1.93                    | trans-1,2-Dichloroethene       | 156-60-5   | C <sub>2</sub> H <sub>2</sub> Cl <sub>2</sub> | 95.9528  | 0.02    | 10                  | 33  |
| 8                               | 1.98                    | 2,2-Dichloropropane            | 594-20-7   | C <sub>3</sub> H <sub>6</sub> Cl <sub>2</sub> | 77.0153  | 0.005   | 2.5                 | 8   |
| 9                               | 2.02                    | Chloroform                     | 67-66-3    | CHCl <sub>3</sub>                             | 82.9449  | 0.006   | 3                   | 10  |
| 10                              | 2.19                    | 1,1,1-Trichloroethane          | 71-55-6    | C <sub>2</sub> H <sub>3</sub> Cl <sub>3</sub> | 96.9606  | 0.004   | 2                   | 7   |
| 11                              | 2.25                    | 1,2-Dichloroethane             | 107-06-2   | C <sub>2</sub> H <sub>4</sub> Cl <sub>2</sub> | 61.9918  | 0.008   | 4                   | 13  |
| 12                              | 2.26                    | 1,1-Dichloropropene            | 563-58-6   | C <sub>3</sub> H <sub>4</sub> Cl <sub>2</sub> | 74.9996  | 0.004   | 2                   | 7   |
| 13                              | 2.33                    | Carbon tetrachloride           | 56-23-5    | CCl <sub>4</sub>                              | 116.9060 | 0.003   | 1.5                 | 5   |
| 14                              | 2.73                    | Trichloroethene                | 79-01-6    | C <sub>2</sub> HCl <sub>3</sub>               | 131.9109 | 0.003   | 1.5                 | 5   |
| 15                              | 2.75                    | 1,2-Dichloropropane            | 78-87-5    | C <sub>3</sub> H <sub>6</sub> Cl <sub>2</sub> | 76.0074  | 0.01    | 5                   | 17  |
| 16                              | 3.36                    | cis-1,3-Dichloropropene        | 10061-01-5 | C <sub>3</sub> H <sub>4</sub> Cl <sub>2</sub> | 74.9996  | 0.001   | 0.5                 | 2   |
| 17                              | 3.95                    | trans-1,3-Dichloropropene      | 10061-02-6 | C <sub>3</sub> H <sub>4</sub> Cl <sub>2</sub> | 74.9996  | 0.01    | 5                   | 17  |
| 18                              | 4.19                    | 1,1,2-Trichloroethane          | 79-00-5    | C <sub>2</sub> H <sub>3</sub> Cl <sub>3</sub> | 96.9606  | 0.01    | 5                   | 17  |
| 19                              | 4.40                    | 1,3-Dichloropropane            | 142-28-9   | C <sub>3</sub> H <sub>6</sub> Cl <sub>2</sub> | 76.0074  | 0.01    | 5                   | 17  |
| 20                              | 4.99                    | Tetrachloroethene              | 127-18-4   | C <sub>2</sub> Cl <sub>4</sub>                | 165.8717 | 0.003   | 1.5                 | 5   |
| 21                              | 6.61                    | 1,1,1,2-Tetrachloroethane      | 630-20-6   | C <sub>2</sub> H <sub>2</sub> Cl <sub>4</sub> | 130.9216 | 0.002   | 1                   | 4   |
| 22                              | 8.42                    | cis-1,4-Dichloro-2-butene      | 1476-11-5  | C <sub>4</sub> H <sub>6</sub> Cl <sub>2</sub> | 88.0074  | 0.005   | 2.5                 | 8   |
| 23                              | 8.93                    | 1,1,2,2-Tetrachloroethane      | 79-34-5    | C <sub>2</sub> H <sub>2</sub> Cl <sub>4</sub> | 82.9450  | 0.002   | 1                   | 4   |
| 24                              | 9.11                    | 1,2,3-Trichloropropane         | 96-18-4    | C <sub>3</sub> H <sub>5</sub> Cl <sub>3</sub> | 74.99958 | 0.001   | 0.5                 | 2   |
| 25                              | 9.17                    | trans-1,4-Dichloro-2-butene    | 110-57-6   | C <sub>4</sub> H <sub>6</sub> Cl <sub>2</sub> | 88.0074  | 0.01    | 5                   | 17  |
| 26                              | 10.80                   | Pentachloroethane              | 76-01-7    | C <sub>2</sub> HCl <sub>5</sub>               | 166.8796 | 0.004   | 2                   | 7   |
| 27                              | 17.19                   | Hexachloro-1,3-butadiene       | 87-68-3    | C <sub>4</sub> Cl <sub>6</sub>                | 224.8404 | 0.001   | 0.5                 | 2   |
| 28                              | 1.61                    | Iodomethane                    | 74-88-4    | CH <sub>3</sub> I                             | 141.9274 | 0.3     | 150                 | 490 |
| 29                              | 1.62                    | 1,1,2-Trichlorotrifluoroethane | 76-13-1    | C <sub>2</sub> Cl <sub>3</sub> F <sub>3</sub> | 150.9323 | 0.045   | 22.5                | 75  |
| 30                              | 2.02                    | Bromochloromethane             | 74-97-5    | CH <sub>2</sub> BrCl                          | 129.9002 | 0.016   | 8                   | 27  |
| 31                              | 2.78                    | Dibromomethane                 | 74-95-3    | CH <sub>2</sub> Br <sub>2</sub>               | 173.8496 | 0.005   | 2.5                 | 8   |
| 32                              | 2.89                    | Bromodichloromethane           | 75-27-4    | CHBrCl <sub>2</sub>                           | 82.9449  | 0.005   | 2.5                 | 8   |
| 33                              | 4.84                    | Dibromochloromethane           | 124-48-1   | CHBr <sub>2</sub> Cl                          | 128.8921 | 0.006   | 3                   | 10  |
| 34                              | 5.13                    | 1,2-Dibromoethane (EDB)        | 106-93-4   | C <sub>2</sub> H <sub>4</sub> Br <sub>2</sub> | 106.9491 | 0.003   | 1.5                 | 5   |
| 35                              | 7.88                    | Bromoform                      | 75-25-2    | CHBr <sub>3</sub>                             | 172.8418 | 0.001   | 0.5                 | 2   |
| N-compounds                     |                         |                                |            |                                               |          |         |                     |     |
| 36                              | 1.61                    | Acrylonitrile                  | 107-13-1   | C <sub>3</sub> H <sub>3</sub> N               | 53.0260  | 0.25    | 125                 | 410 |
| 37                              | 1.78                    | Propionitrile                  | 107-12-0   | C <sub>3</sub> H <sub>5</sub> N               | 54.0339  | 0.04    | 20                  | 66  |
| 38                              | 1.93                    | Methacrylonitrile              | 126-98-7   | C <sub>4</sub> H <sub>5</sub> N               | 67.0416  | 0.03    | 15                  | 50  |
| 39                              | 13.92                   | Nitrobenzene                   | 98-95-3    | C <sub>6</sub> H <sub>5</sub> NO <sub>2</sub> | 77.0386  | 0.003   | 1.5                 | 5   |
| S- and O-compounds              |                         |                                |            |                                               |          |         |                     |     |
| 40                              | 1.66                    | Carbon disulfide               | 75-15-0    | CS <sub>2</sub>                               | 75.9436  | 0.064   | 32                  | 110 |
| 41                              | 1.95                    | Methyl acrylate                | 96-33-3    | C <sub>4</sub> H <sub>6</sub> O <sub>2</sub>  | 85.0284  | 0.03    | 15                  | 50  |

|    |      |                     |          |                                               |         |       |     |     |
|----|------|---------------------|----------|-----------------------------------------------|---------|-------|-----|-----|
| 42 | 2.04 | Isobutyl alcohol    | 78-83-1  | C <sub>4</sub> H <sub>10</sub> O              | 43.0541 | 0.1   | 50  | 170 |
| 43 | 2.05 | Tetrahydrofuran     | 109-99-9 | C <sub>4</sub> H <sub>8</sub> O               | 71.0492 | 0.02  | 10  | 33  |
| 44 | 2.82 | 1,4-Dioxane         | 123-91-1 | C <sub>4</sub> H <sub>8</sub> O <sub>2</sub>  | 88.0518 | 0.003 | 1.5 | 5   |
| 45 | 2.86 | Methyl methacrylate | 80-62-6  | C <sub>5</sub> H <sub>8</sub> O <sub>2</sub>  | 99.0440 | 0.004 | 2   | 7   |
| 46 | 4.41 | Ethyl methacrylate  | 97-63-2  | C <sub>6</sub> H <sub>10</sub> O <sub>2</sub> | 99.0441 | 0.01  | 5   | 17  |

#### Aromatic hydrocarbons

|    |       |                           |          |                                 |          |       |     |   |
|----|-------|---------------------------|----------|---------------------------------|----------|-------|-----|---|
| 47 | 2.31  | Benzene                   | 71-43-2  | C <sub>6</sub> H <sub>6</sub>   | 78.0464  | 0.003 | 1.5 | 5 |
| 48 | 3.90  | Toluene                   | 108-88-3 | C <sub>7</sub> H <sub>8</sub>   | 91.0542  | 0.002 | 1   | 4 |
| 49 | 6.89  | Ethylbenzene              | 100-41-4 | C <sub>8</sub> H <sub>10</sub>  | 91.05425 | 0.001 | 0.5 | 2 |
| 50 | 7.20  | <i>m</i> -Xylene          | 108-38-3 | C <sub>8</sub> H <sub>10</sub>  | 91.05425 | 0.005 | 2.5 | 8 |
| 51 | 7.20  | <i>p</i> -Xylene          | 95-47-6  | C <sub>8</sub> H <sub>10</sub>  | 91.05425 | 0.005 | 2.5 | 8 |
| 52 | 7.93  | Styrene                   | 100-42-5 | C <sub>8</sub> H <sub>8</sub>   | 104.0620 | 0.002 | 1   | 4 |
| 53 | 7.96  | <i>o</i> -Xylene          | 106-42-3 | C <sub>8</sub> H <sub>10</sub>  | 91.05425 | 0.003 | 1.5 | 5 |
| 54 | 9.01  | Isopropylbenzene          | 98-82-8  | C <sub>9</sub> H <sub>12</sub>  | 105.0699 | 0.001 | 0.5 | 2 |
| 55 | 10.00 | <i>n</i> -Propylbenzene   | 103-65-1 | C <sub>9</sub> H <sub>12</sub>  | 91.05424 | 0.001 | 0.5 | 2 |
| 56 | 10.51 | 1,3,5-Trimethylbenzene    | 108-67-8 | C <sub>9</sub> H <sub>12</sub>  | 105.0698 | 0.002 | 1   | 4 |
| 57 | 11.18 | <i>tert</i> -Butylbenzene | 98-06-6  | C <sub>10</sub> H <sub>14</sub> | 119.0855 | 0.001 | 0.5 | 2 |
| 58 | 11.29 | 1,2,4-Trimethylbenzene    | 95-63-6  | C <sub>9</sub> H <sub>12</sub>  | 105.0698 | 0.004 | 2   | 7 |
| 59 | 11.73 | <i>sec</i> -Butylbenzene  | 135-98-8 | C <sub>10</sub> H <sub>14</sub> | 105.0699 | 0.002 | 1   | 4 |
| 60 | 12.21 | 4-Isopropyltoluene        | 99-87-6  | C <sub>10</sub> H <sub>14</sub> | 119.0855 | 0.002 | 1   | 4 |
| 61 | 13.11 | <i>n</i> -Butylbenzene    | 104-51-8 | C <sub>10</sub> H <sub>14</sub> | 91.0542  | 0.003 | 1.5 | 5 |

#### Halogenated aromatic hydrocarbons

|    |       |                             |          |                                                  |          |       |     |   |
|----|-------|-----------------------------|----------|--------------------------------------------------|----------|-------|-----|---|
| 62 | 6.35  | Chlorobenzene               | 108-90-7 | C <sub>6</sub> H <sub>5</sub> Cl                 | 112.0074 | 0.002 | 1   | 4 |
| 63 | 9.20  | Bromobenzene                | 108-86-1 | C <sub>6</sub> H <sub>5</sub> Br                 | 155.9568 | 0.004 | 2   | 7 |
| 64 | 9.86  | 2-Chlorotoluene             | 95-49-8  | C <sub>7</sub> H <sub>7</sub> Cl                 | 126.0231 | 0.004 | 2   | 7 |
| 65 | 10.12 | 4-Chlorotoluene             | 106-43-4 | C <sub>7</sub> H <sub>7</sub> Cl                 | 126.0231 | 0.005 | 2.5 | 8 |
| 66 | 11.58 | 1,3-Dichlorobenzene         | 541-73-1 | C <sub>6</sub> H <sub>4</sub> Cl <sub>2</sub>    | 145.9684 | 0.005 | 2.5 | 8 |
| 67 | 11.87 | 1,4-Dichlorobenzene         | 106-46-7 | C <sub>6</sub> H <sub>4</sub> Cl <sub>2</sub>    | 145.9684 | 0.005 | 2.5 | 8 |
| 68 | 12.38 | 1,2-Dichlorobenzene         | 95-50-1  | C <sub>6</sub> H <sub>4</sub> Cl <sub>2</sub>    | 145.9684 | 0.003 | 1.5 | 5 |
| 69 | 13.98 | 1,2-Dibromo-3-chloropropane | 96-12-8  | C <sub>3</sub> H <sub>5</sub> Br <sub>2</sub> Cl | 74.9996  | 0.003 | 1.5 | 5 |
| 70 | 16.31 | 1,2,4-Trichlorobenzene      | 120-82-1 | C <sub>6</sub> H <sub>3</sub> Cl <sub>3</sub>    | 179.9293 | 0.001 | 0.5 | 2 |
| 71 | 17.11 | 1,2,3-Trichlorobenzene      | 87-61-6  | C <sub>6</sub> H <sub>3</sub> Cl <sub>3</sub>    | 179.9294 | 0.001 | 0.5 | 2 |

\* - recalculated for air sample volume of 2L

**Table S3.** Target SVOCs, corresponding quantifier ions and limits of detection and quantification

| №                 | t <sub>r</sub> ,<br>min | Compounds                   | CAS #     | Formula                                                       | m/z      | LOD     | LOD   | LOQ  |
|-------------------|-------------------------|-----------------------------|-----------|---------------------------------------------------------------|----------|---------|-------|------|
|                   |                         |                             |           |                                                               |          | ng/tube | ng/m³ |      |
| N-compounds       |                         |                             |           |                                                               |          |         |       |      |
| 72                | 3.35                    | N-Nitrosodimethylamine      | 62–75–9   | C <sub>2</sub> H <sub>6</sub> N <sub>2</sub> O                | 74.0474  | 0.02    | 10    | 33   |
| 73                | 3.39                    | Pyridine                    | 110–86–1  | C <sub>5</sub> H <sub>5</sub> N                               | 79.0416  | 0.01    | 5     | 17   |
| 74                | 10.72                   | Aniline                     | 62–53–3   | C <sub>6</sub> H <sub>5</sub> NH <sub>2</sub>                 | 93.0573  | 0.01    | 5     | 17   |
| 75                | 13.50                   | N-Nitroso-di-n-propylamine  | 621–64–7  | C <sub>6</sub> H <sub>14</sub> N <sub>2</sub> O               | 113.1073 | 0.006   | 3     | 10   |
| 76                | 15.12                   | 2-Nitrophenol               | 88–75–5   | C <sub>6</sub> H <sub>5</sub> NO <sub>3</sub>                 | 139.0263 | 0.01    | 5     | 17   |
| 77                | 16.95                   | 4-Chloroaniline             | 106–47–8  | C <sub>6</sub> H <sub>4</sub> NH <sub>2</sub> Cl              | 127.0183 | 0.02    | 10    | 33   |
| 78                | 21.58                   | 2-Nitroaniline              | 88–74–4   | C <sub>6</sub> H <sub>6</sub> N <sub>2</sub> O <sub>2</sub>   | 138.0423 | 0.021   | 10.5  | 35   |
| 79                | 22.17                   | 1,4-Dinitrobenzene          | 100–25–4  | C <sub>6</sub> H <sub>4</sub> N <sub>2</sub> O <sub>4</sub>   | 168.0164 | 0.045   | 22.5  | 74   |
| 80                | 22.42                   | 1,3-Dinitrobenzene          | 99–65–0   | C <sub>6</sub> H <sub>4</sub> N <sub>2</sub> O <sub>4</sub>   | 168.0164 | 0.03    | 15    | 50   |
| 81                | 22.62                   | 2,6-Dinitrotoluene          | 606–20–2  | C <sub>7</sub> H <sub>6</sub> N <sub>2</sub> O <sub>4</sub>   | 165.0294 | 0.005   | 2.5   | 8    |
| 82                | 22.74                   | 1,2-Dinitrobenzene          | 528–29–0  | C <sub>6</sub> H <sub>4</sub> N <sub>2</sub> O <sub>4</sub>   | 168.0164 | 0.06    | 30    | 99   |
| 83                | 23.20                   | 3-Nitroaniline              | 99–09–2   | C <sub>6</sub> H <sub>6</sub> N <sub>2</sub> O <sub>2</sub>   | 138.0423 | 0.1     | 50    | 170  |
| 84                | 23.62                   | 2,4-Dinitrophenol           | 51–28–5   | C <sub>6</sub> H <sub>4</sub> N <sub>2</sub> O <sub>5</sub>   | 184.0113 | 0.85    | 425   | 1400 |
| 85                | 24.13                   | 2,4-Dinitrotoluene          | 121–14–2  | C <sub>7</sub> H <sub>6</sub> N <sub>2</sub> O <sub>4</sub>   | 165.0294 | 0.008   | 4     | 13   |
| 86                | 25.55                   | 4-Nitroaniline              | 100–01–6  | C <sub>6</sub> H <sub>6</sub> N <sub>2</sub> O <sub>2</sub>   | 138.0423 | 0.5     | 250   | 830  |
| 87                | 25.67                   | 4,6-Dinitro-2-methylphenol  | 534–52–1  | C <sub>7</sub> H <sub>6</sub> N <sub>2</sub> O <sub>5</sub>   | 198.0269 | 0.5     | 250   | 830  |
| 88                | 25.97                   | Diphenylamine               | 122–39–4  | C <sub>12</sub> H <sub>11</sub> N                             | 169.0886 | 0.006   | 3     | 10   |
| 89                | 26.07                   | Azobenzene                  | 103–33–3  | C <sub>12</sub> H <sub>10</sub> N <sub>2</sub>                | 182.0838 | 0.003   | 1.5   | 5    |
| 90                | 29.88                   | Carbazole                   | 86–74–8   | C <sub>12</sub> H <sub>9</sub> N                              | 167.0727 | 0.01    | 5     | 17   |
| CHO-compounds     |                         |                             |           |                                                               |          |         |       |      |
| 91                | 10.90                   | Phenol                      | 108–95–2  | C <sub>6</sub> H <sub>6</sub> O                               | 94.0413  | 0.004   | 2     | 7    |
| 92                | 12.55                   | Benzyl alcohol              | 100–51–6  | C <sub>7</sub> H <sub>8</sub> O                               | 79.0542  | 0.01    | 5     | 17   |
| 93                | 13.05                   | 2-Methylphenol              | 95–48–7   | C <sub>7</sub> H <sub>8</sub> O                               | 108.0569 | 0.004   | 2     | 7    |
| 94                | 13.67                   | 3-Methylphenol              | 108–39–4  | C <sub>7</sub> H <sub>8</sub> O                               | 108.0569 | 0.01    | 5     | 17   |
| 95                | 13.67                   | 4-Methylphenol              | 106–44–5  | C <sub>7</sub> H <sub>8</sub> O                               | 108.0569 | 0.01    | 5     | 17   |
| 96                | 15.60                   | 2,4-Dimethylphenol          | 105–67–9  | C <sub>8</sub> H <sub>10</sub> O                              | 122.0726 | 0.02    | 10    | 33   |
| 97                | 16.29                   | Benzoic acid                | 65-85-0   | C <sub>7</sub> H <sub>6</sub> O <sub>2</sub>                  | 122.0363 | 0.3     | 148   | 490  |
| Halogenated SVOCs |                         |                             |           |                                                               |          |         |       |      |
| 98                | 11.08                   | 2-Chlorophenol              | 95–57–8   | C <sub>6</sub> H <sub>5</sub> OCl                             | 128.0023 | 0.005   | 2.5   | 8    |
| 99                | 16.07                   | 2,4-Dichlorophenol          | 120–83–2  | C <sub>6</sub> H <sub>4</sub> Cl <sub>2</sub> O               | 161.9632 | 0.02    | 10    | 33   |
| 100               | 19.03                   | 4-Chloro-3-methylphenol     | 59–50–7   | C <sub>7</sub> H <sub>7</sub> ClO                             | 142.0179 | 0.015   | 7.5   | 25   |
| 101               | 20.52                   | 2,4,6-Trichlorophenol       | 95–95–4   | C <sub>6</sub> H <sub>3</sub> Cl <sub>3</sub> O               | 195.9243 | 0.006   | 3     | 10   |
| 102               | 20.62                   | 2,4,5-Trichlorophenol       | 88–06–2   | C <sub>6</sub> H <sub>3</sub> Cl <sub>3</sub> O               | 195.9243 | 0.008   | 4     | 13   |
| 103               | 24.39                   | 2,3,5,6-Tetrachlorophenol   | 935–95–5  | C <sub>6</sub> H <sub>2</sub> Cl <sub>4</sub> O               | 231.8822 | 0.02    | 10    | 33   |
| 104               | 24.55                   | 2,3,4,6-Tetrachlorophenol   | 58–90–2   | C <sub>6</sub> H <sub>2</sub> Cl <sub>4</sub> O               | 231.8822 | 0.015   | 7.5   | 25   |
| 105               | 25.49                   | 4-Chlorophenyl phenyl ether | 7005–72–3 | C <sub>12</sub> H <sub>9</sub> ClO                            | 204.0335 | 0.002   | 1     | 4    |
| 106               | 28.23                   | Pentachlorophenol           | 87–86–5   | C <sub>6</sub> HCl <sub>5</sub> O                             | 265.8432 | 0.13    | 65    | 210  |
| 107               | 11.07                   | Bis(2-chloroethyl)ether     | 111–44–4  | C <sub>4</sub> H <sub>8</sub> Cl <sub>2</sub> O               | 62.9996  | 0.006   | 3     | 10   |
| 108               | 13.57                   | Hexachloroethane            | 67–72–1   | C <sub>2</sub> Cl <sub>6</sub>                                | 200.8407 | 0.001   | 0.5   | 2    |
| 109               | 15.92                   | Bis(2-chloroethoxy)methane  | 111–91–1  | C <sub>5</sub> H <sub>10</sub> Cl <sub>2</sub> O <sub>2</sub> | 93.0102  | 0.004   | 2     | 7    |
| 110               | 19.91                   | Hexachlorocyclopentadiene   | 77–47–4   | C <sub>5</sub> Cl <sub>6</sub>                                | 236.8405 | 0.042   | 21    | 70   |
| 111               | 21.02                   | 2-Chloronaphthalene         | 91–58–7   | C <sub>10</sub> H <sub>7</sub> Cl                             | 162.0229 | 0.001   | 0.5   | 2    |
| 112               | 27.37                   | Hexachlorobenzene           | 118–74–1  | C <sub>6</sub> Cl <sub>6</sub>                                | 283.8093 | 0.003   | 1.5   | 5    |

| Polycyclic aromatic hydrocarbons |       |                               |          |                                                |          |       |     |      |
|----------------------------------|-------|-------------------------------|----------|------------------------------------------------|----------|-------|-----|------|
| 113                              | 16.51 | Naphthalene                   | 91–20–3  | C <sub>10</sub> H <sub>8</sub>                 | 128.0620 | 0.001 | 0.5 | 2    |
| 114                              | 19.21 | 2-Methylnaphthalene           | 91–57–6  | C <sub>11</sub> H <sub>10</sub>                | 141.0699 | 0.001 | 0.5 | 2    |
| 115                              | 19.56 | 1-Methylnaphthalene           | 90–12–0  | C <sub>11</sub> H <sub>10</sub>                | 141.0699 | 0.001 | 0.5 | 2    |
| 116                              | 22.55 | Acenaphthylene                | 208–96–8 | C <sub>12</sub> H <sub>8</sub>                 | 152.0619 | 0.001 | 0.5 | 2    |
| 117                              | 23.26 | Acenaphthene                  | 83–32–9  | C <sub>12</sub> H <sub>10</sub>                | 153.0698 | 0.001 | 0.5 | 2    |
| 118                              | 23.94 | Dibenzofuran                  | 53–70–3  | C <sub>12</sub> H <sub>8</sub> O               | 168.0568 | 0.001 | 0.5 | 2    |
| 119                              | 25.25 | Fluorene                      | 86–73–7  | C <sub>13</sub> H <sub>10</sub>                | 165.0697 | 0.001 | 0.5 | 2    |
| 120                              | 28.89 | Phenanthrene                  | 85–01–8  | C <sub>14</sub> H <sub>10</sub>                | 178.0773 | 0.013 | 6.5 | 22   |
| 121                              | 29.09 | Anthracene                    | 120–12–7 | C <sub>14</sub> H <sub>10</sub>                | 178.0773 | 0.004 | 2   | 7    |
| 122                              | 33.47 | Fluoranthene                  | 206–44–0 | C <sub>16</sub> H <sub>10</sub>                | 202.0772 | 0.002 | 1   | 4    |
| 123                              | 34.27 | Pyrene                        | 129–00–0 | C <sub>16</sub> H <sub>10</sub>                | 202.0772 | 0.002 | 1   | 4    |
| 124                              | 38.97 | Benz[a]anthracene             | 56–55–3  | C <sub>18</sub> H <sub>12</sub>                | 228.0931 | 0.02  | 10  | 33   |
| 125                              | 39.09 | Chrysene                      | 218–01–9 | C <sub>18</sub> H <sub>12</sub>                | 228.0931 | 0.015 | 7.5 | 25   |
| 126                              | 42.94 | Benzo[b]fluoranthene          | 205–99–2 | C <sub>20</sub> H <sub>12</sub>                | 252.0929 | 0.05  | 25  | 83   |
| 127                              | 43.03 | Benzo[k]fluoranthene          | 207–08–9 | C <sub>20</sub> H <sub>12</sub>                | 252.0929 | 0.04  | 20  | 66   |
| 128                              | 43.93 | Benzo[a]pyrene                | 50–32–8  | C <sub>20</sub> H <sub>12</sub>                | 252.0929 | 0.16  | 80  | 260  |
| 129                              | 48.27 | Benzo[g,h,i]perylene          | 191–24–2 | C <sub>22</sub> H <sub>12</sub>                | 276.0929 | 0.85  | 425 | 1400 |
| Phthalates                       |       |                               |          |                                                |          |       |     |      |
| 130                              | 22.51 | Dimethylphthalate             | 131–11–3 | C <sub>10</sub> H <sub>10</sub> O <sub>4</sub> | 163.0388 | 0.002 | 1   | 4    |
| 131                              | 25.32 | Diethylphthalate              | 84–66–2  | C <sub>12</sub> H <sub>14</sub> O <sub>4</sub> | 149.0232 | 0.001 | 0.5 | 2    |
| 132                              | 31.78 | Di- <i>n</i> -butyl phthalate | 84–74–2  | C <sub>16</sub> H <sub>22</sub> O <sub>4</sub> | 149.0232 | 0.001 | 0.5 | 2    |
| 133                              | 37.49 | Benzyl butyl phthalate        | 85–68–7  | C <sub>19</sub> H <sub>20</sub> O <sub>4</sub> | 149.0232 | 0.002 | 1   | 4    |
| 134                              | 38.17 | Bis(2-ethylhexyl)adipate      | 103–23–1 | C <sub>22</sub> H <sub>42</sub> O <sub>4</sub> | 129.0545 | 0.015 | 7.5 | 25   |
| 135                              | 40.01 | Bis(2-ethylhexyl)phthalate    | 117–81–7 | C <sub>24</sub> H <sub>38</sub> O <sub>4</sub> | 149.0232 | 0.002 | 1   | 3.3  |
| 136                              | 42.42 | Di- <i>n</i> -octyl phthalate | 117–84–0 | C <sub>24</sub> H <sub>38</sub> O <sub>4</sub> | 149.0232 | 0.01  | 5   | 17   |
| Br-compounds                     |       |                               |          |                                                |          |       |     |      |
| 137                              | 27.33 | 4-Bromophenyl phenyl ether    | 101–55–3 | C <sub>12</sub> H <sub>9</sub> BrO             | 247.9828 | 0.003 | 1.5 | 5    |
| O-compounds                      |       |                               |          |                                                |          |       |     |      |
| 138                              | 14.87 | Isophorone                    | 78–59–1  | C <sub>9</sub> H <sub>14</sub> O               | 82.0412  | 0.001 | 0.5 | 2    |

\* - recalculated for air sample volume of 2L

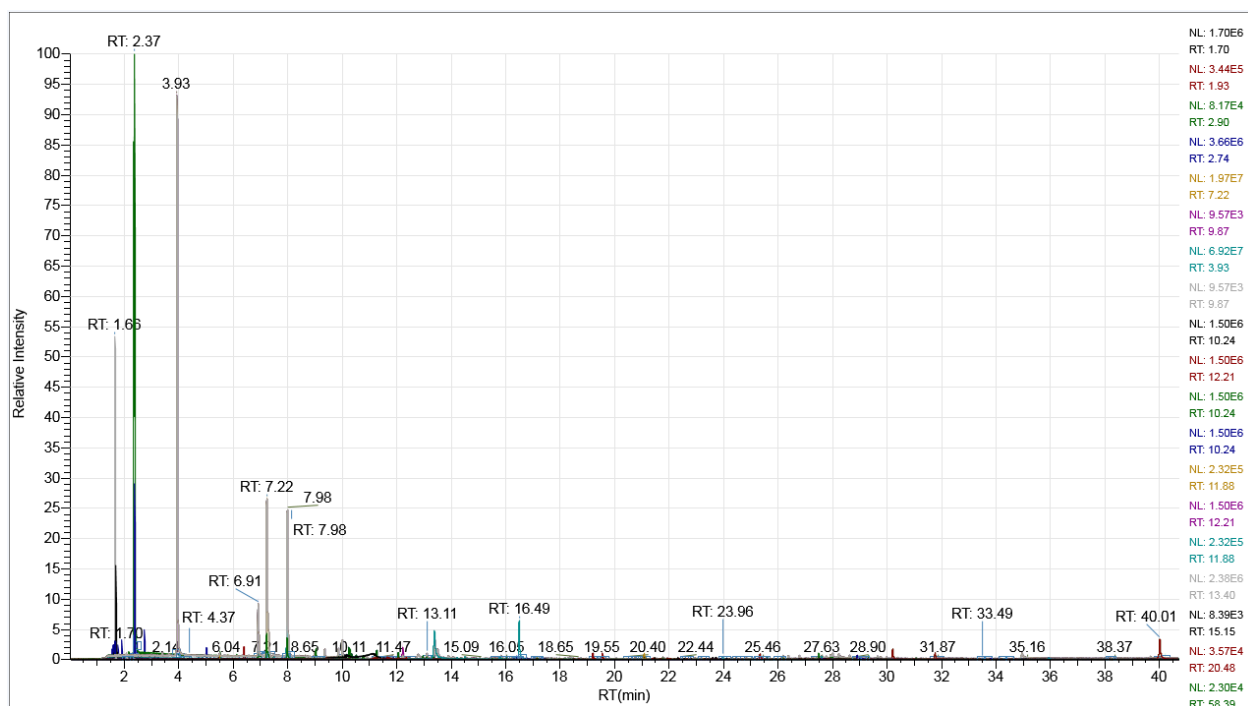

Figure S1. Reconstructed XIC chromatogram of the target analytes in air sample No. 1

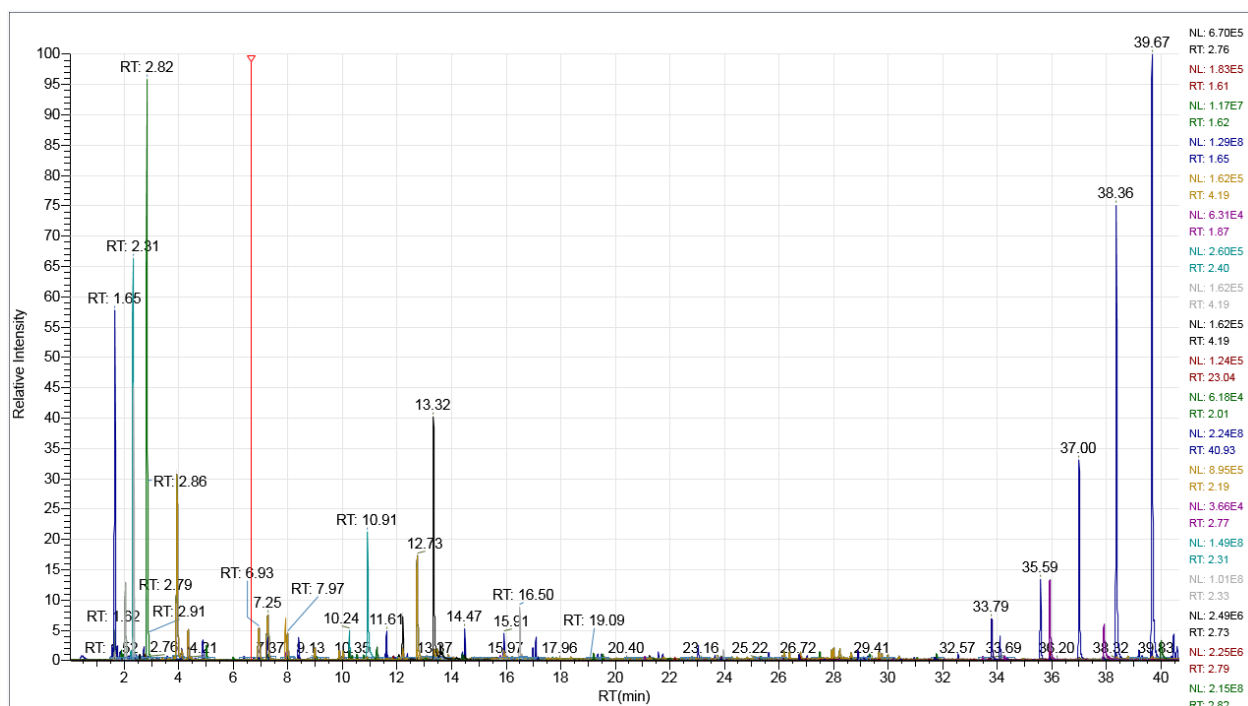

Figure S2. Reconstructed XIC chromatogram of the target analytes in air sample No. 2

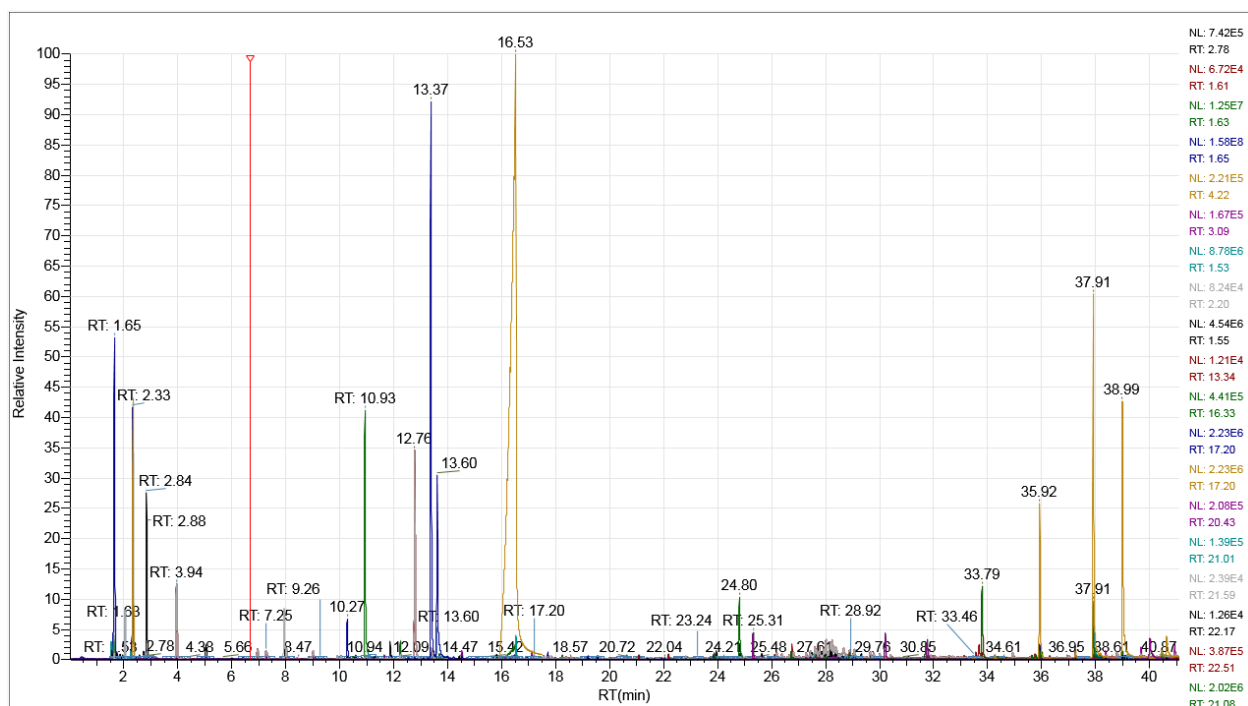

Figure S3. Reconstructed XIC chromatogram of the target analytes in air sample No. 3

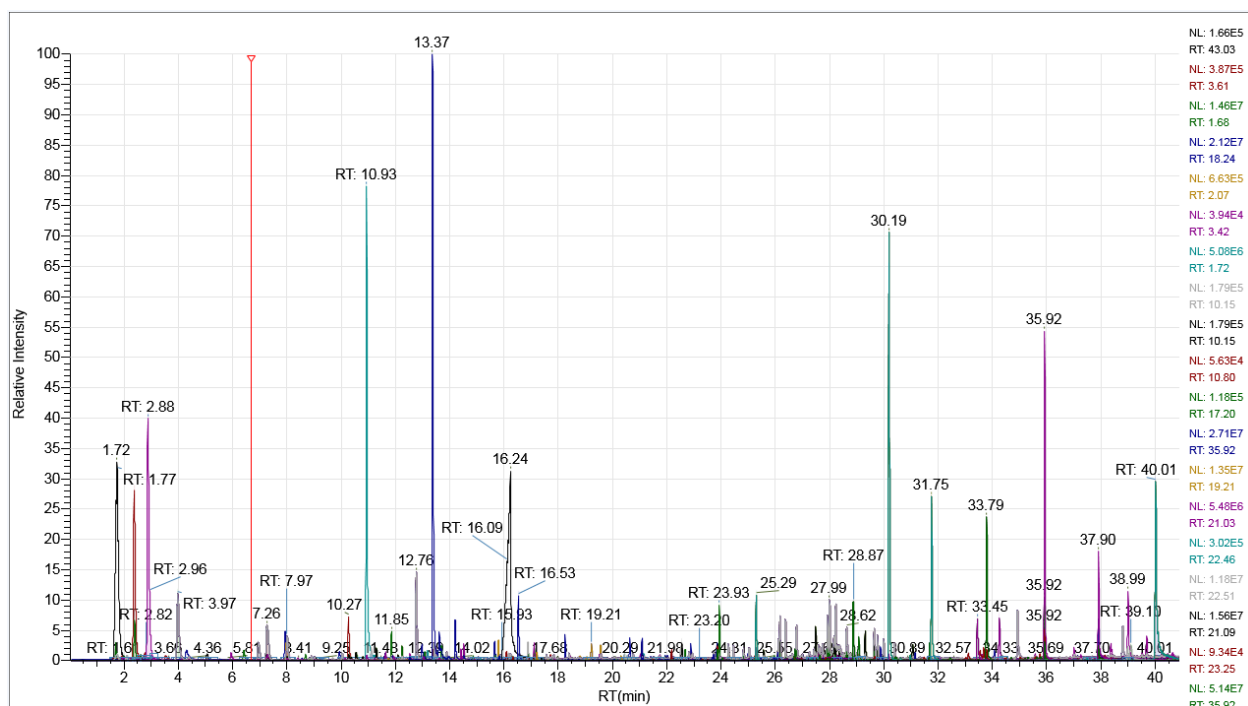

Figure S4. Reconstructed XIC chromatogram of the target analytes in air sample No. 4

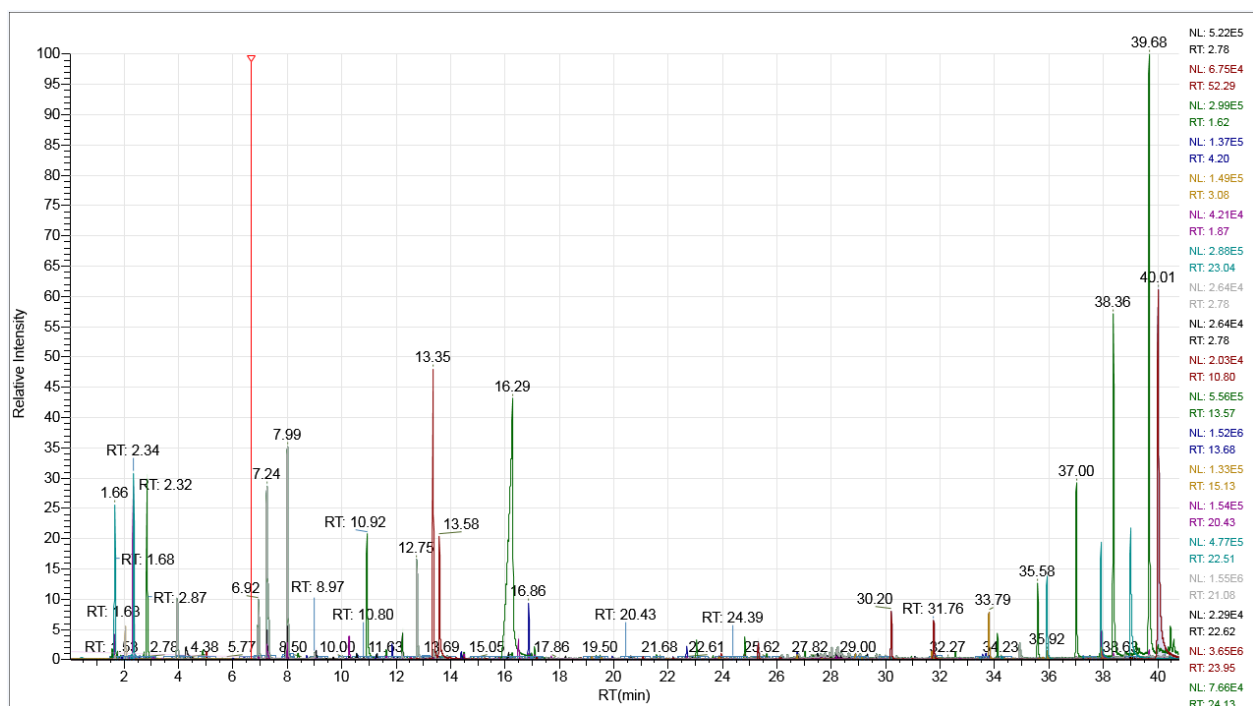

Figure S5. Reconstructed XIC chromatogram of the target analytes in air sample No. 5

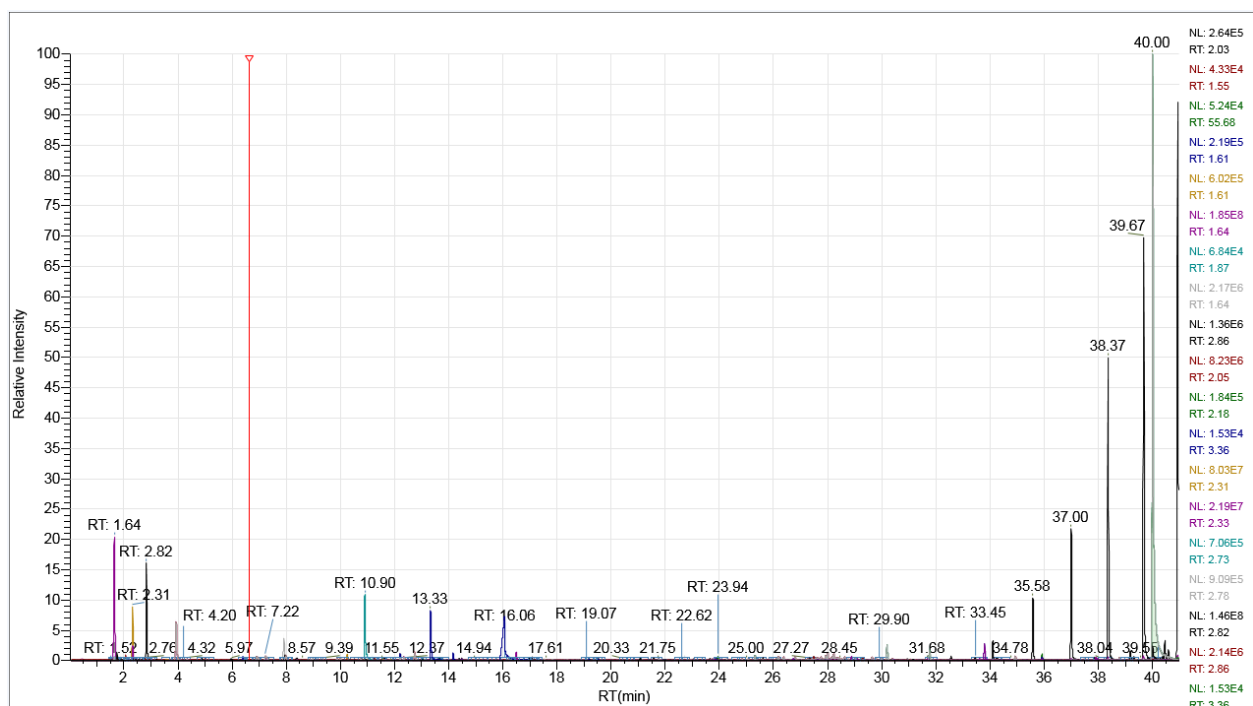

Figure S6. Reconstructed XIC chromatogram of the target analytes in air sample No. 6



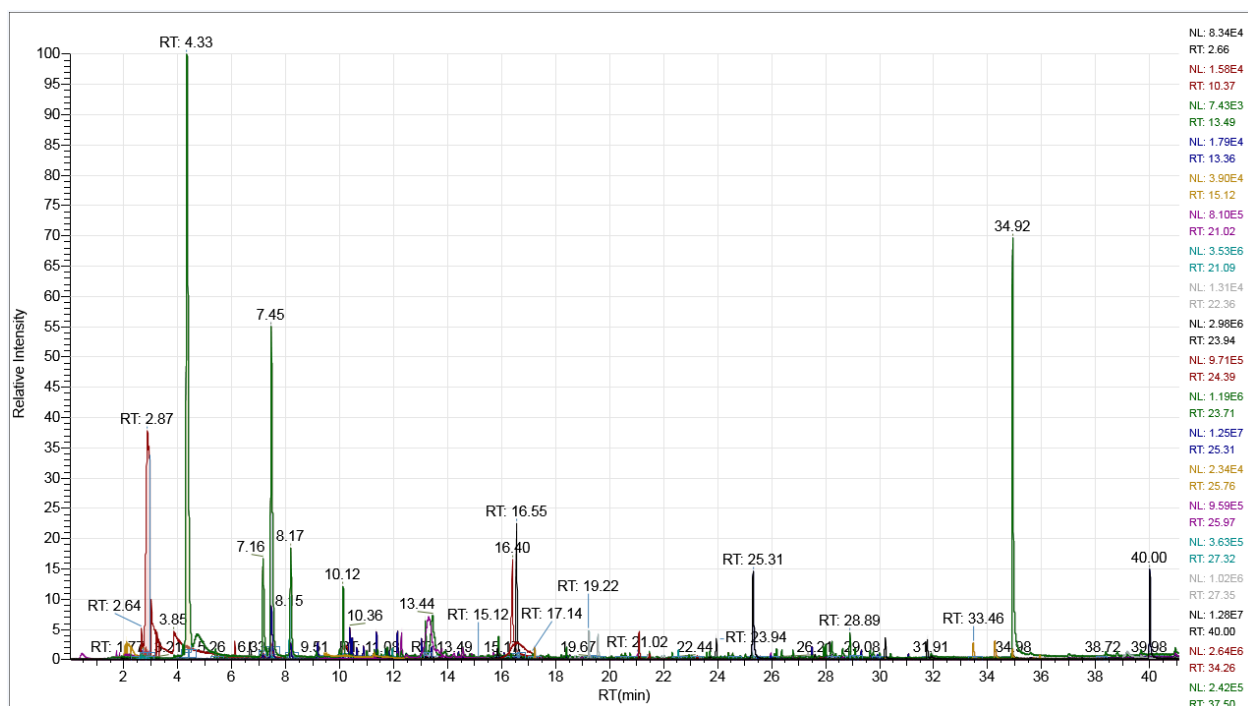

Figure S7. Reconstructed XIC chromatogram of the target analytes in air sample No. 7

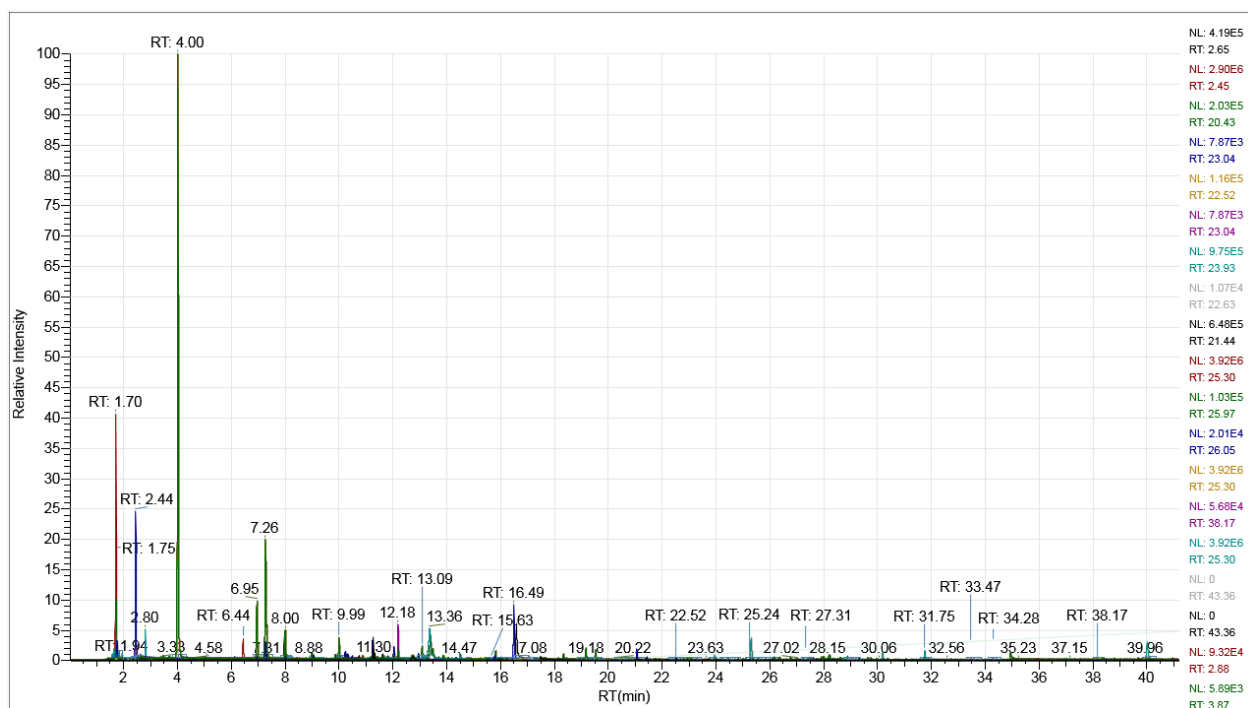

Figure S8. Reconstructed XIC chromatogram of the target analytes in air sample No. 8

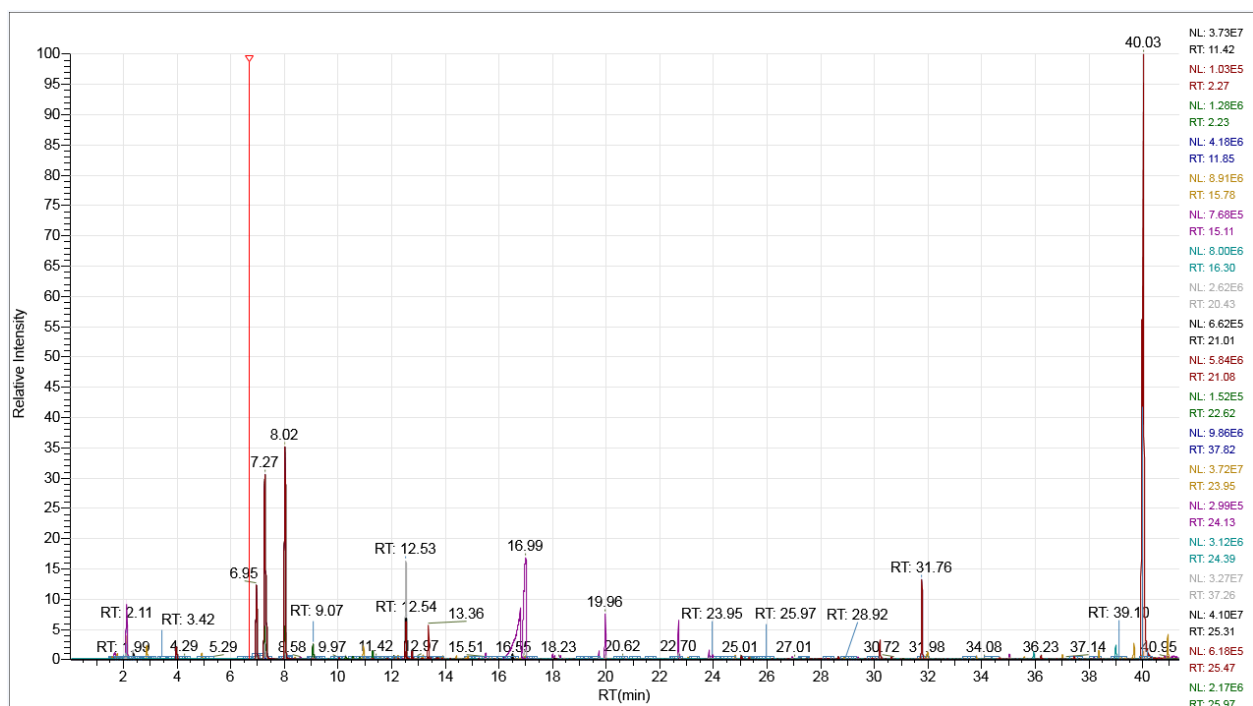

Figure S9. Reconstructed XIC chromatogram of the target analytes in air sample No. 9

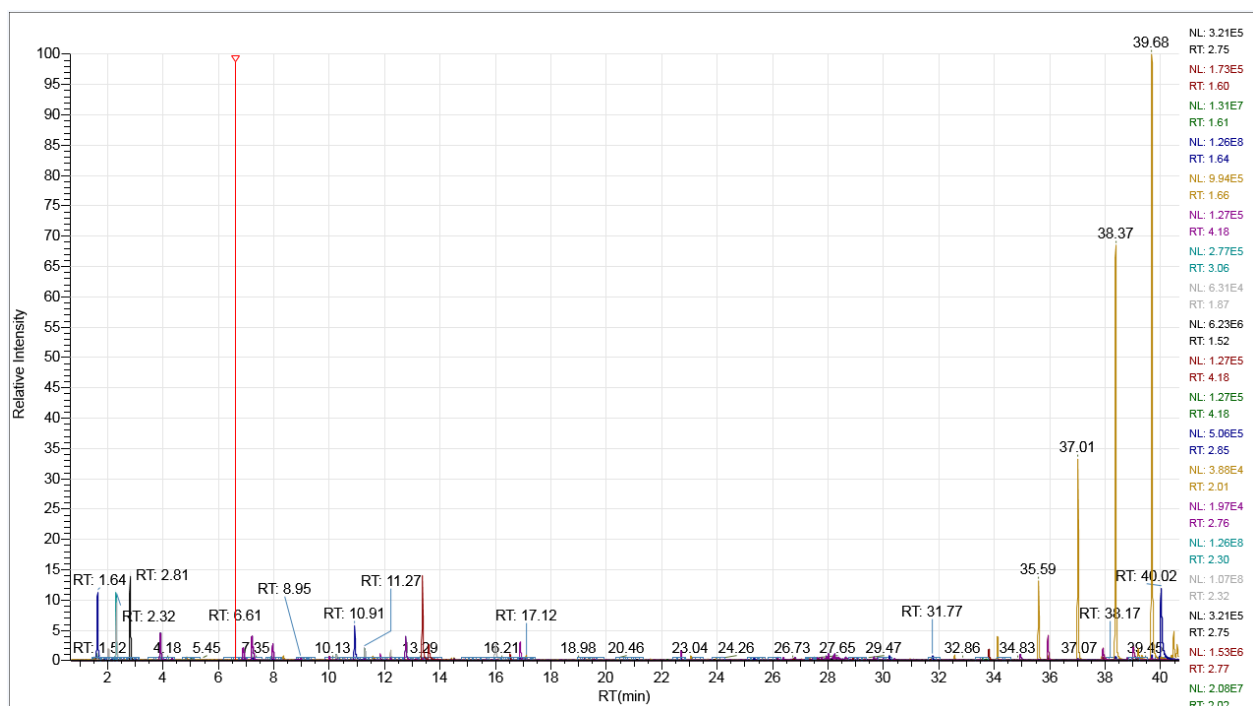

Figure S10. Reconstructed XIC chromatogram of the target analytes in air sample No. 10

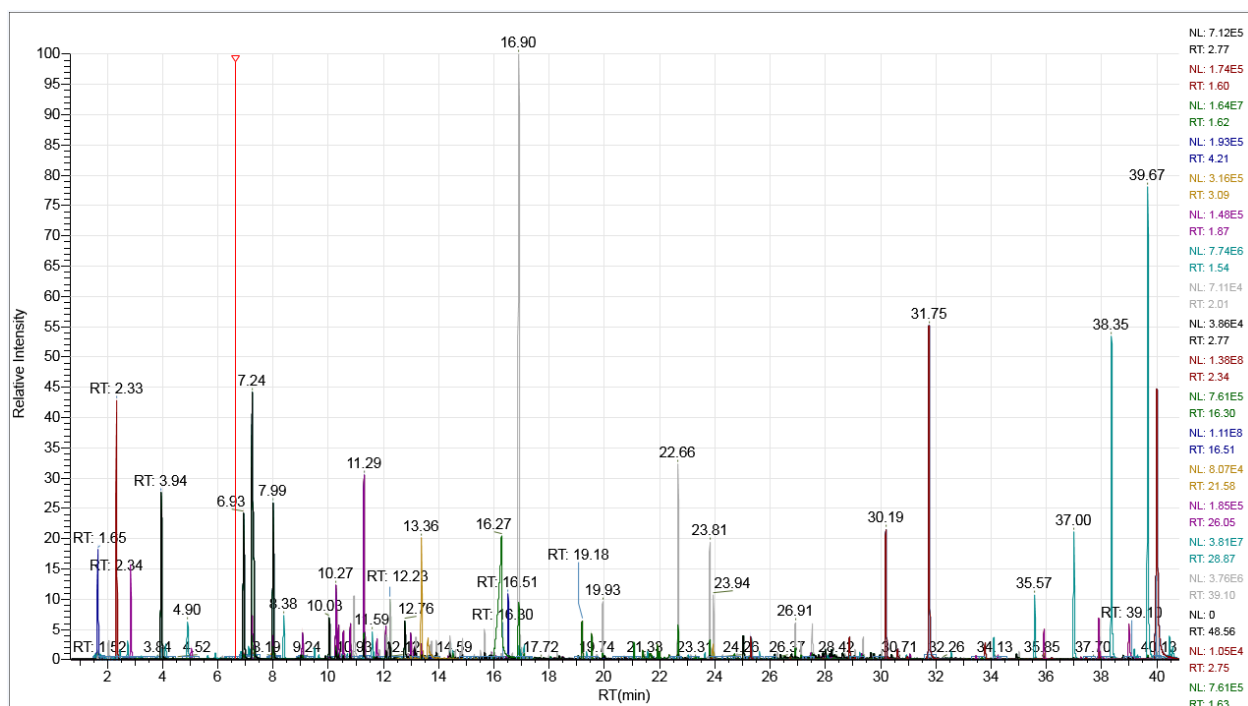

Figure S11. Reconstructed XIC chromatogram of the target analytes in air sample No. 11

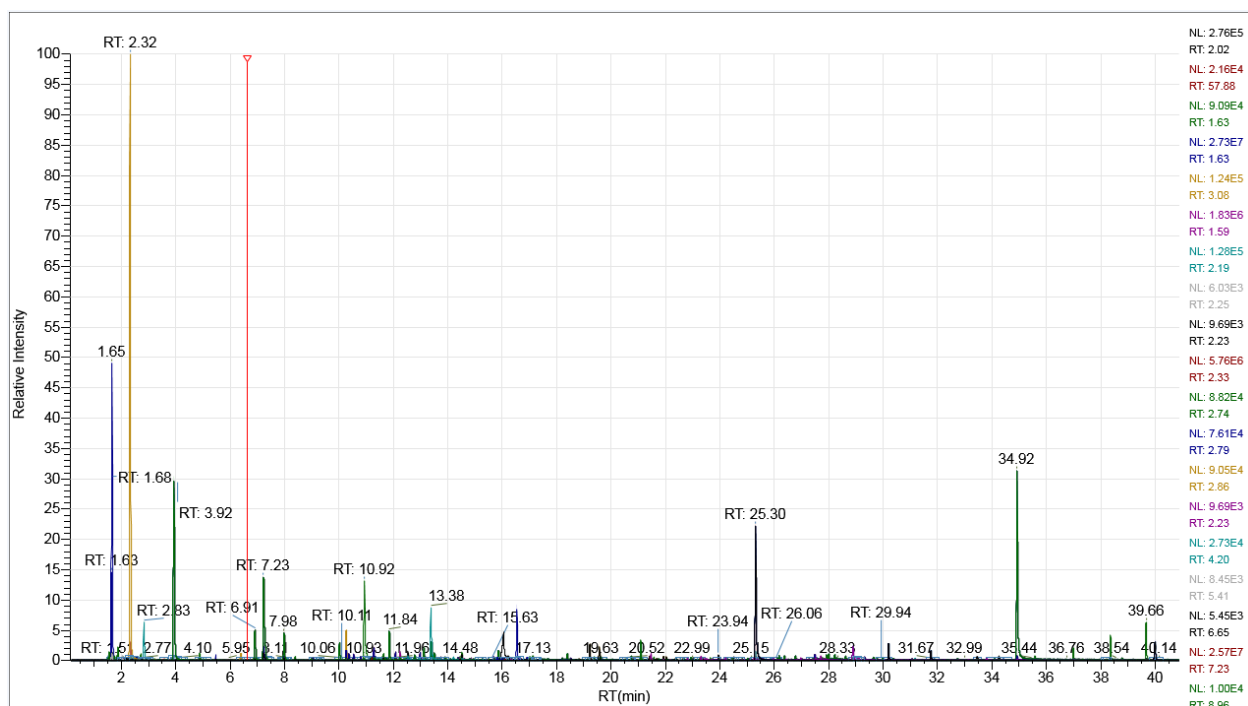

Figure S12. Reconstructed XIC chromatogram of the target analytes in air sample No. 12

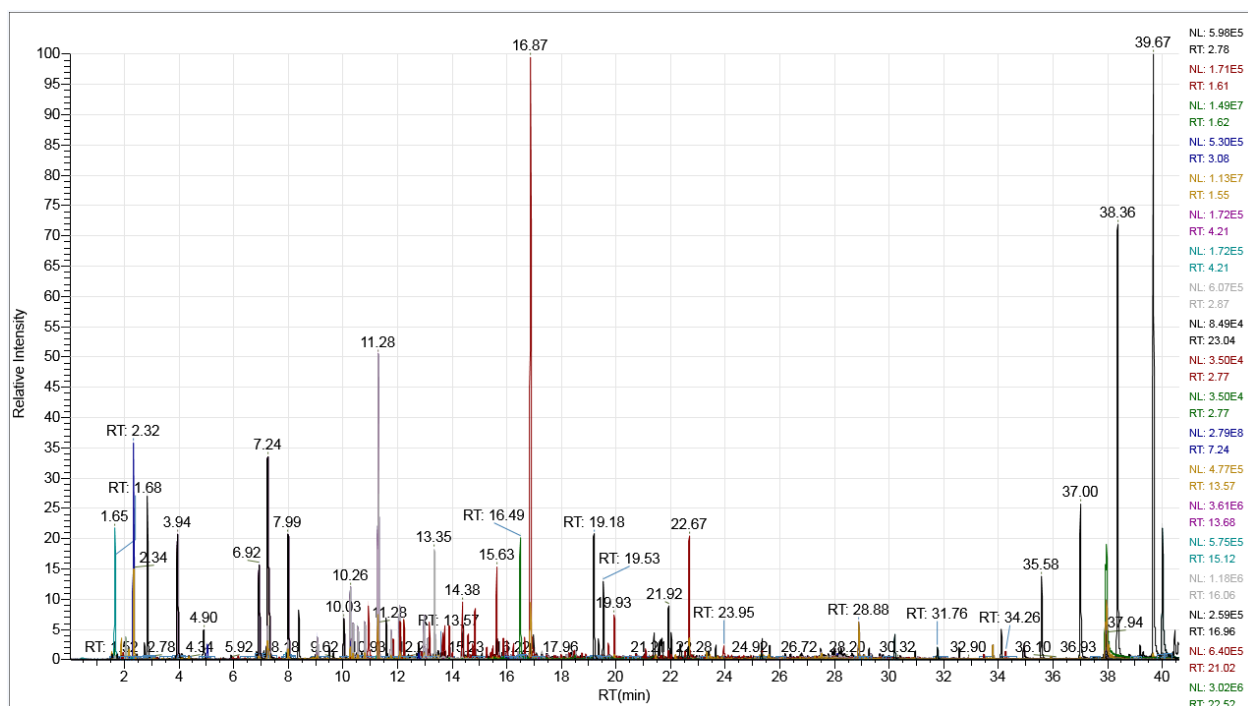

Figure S13. Reconstructed XIC chromatogram of the target analytes in air sample No. 13

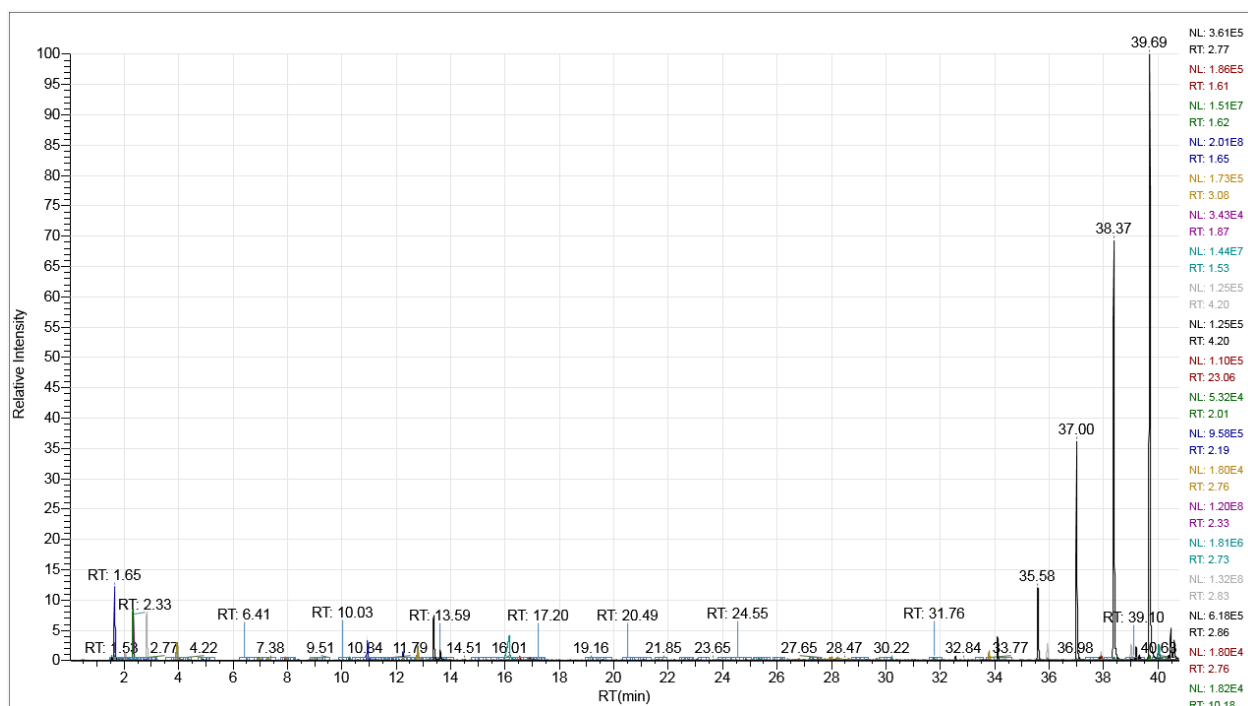

Figure S14. Reconstructed XIC chromatogram of the target analytes in air sample No. 14

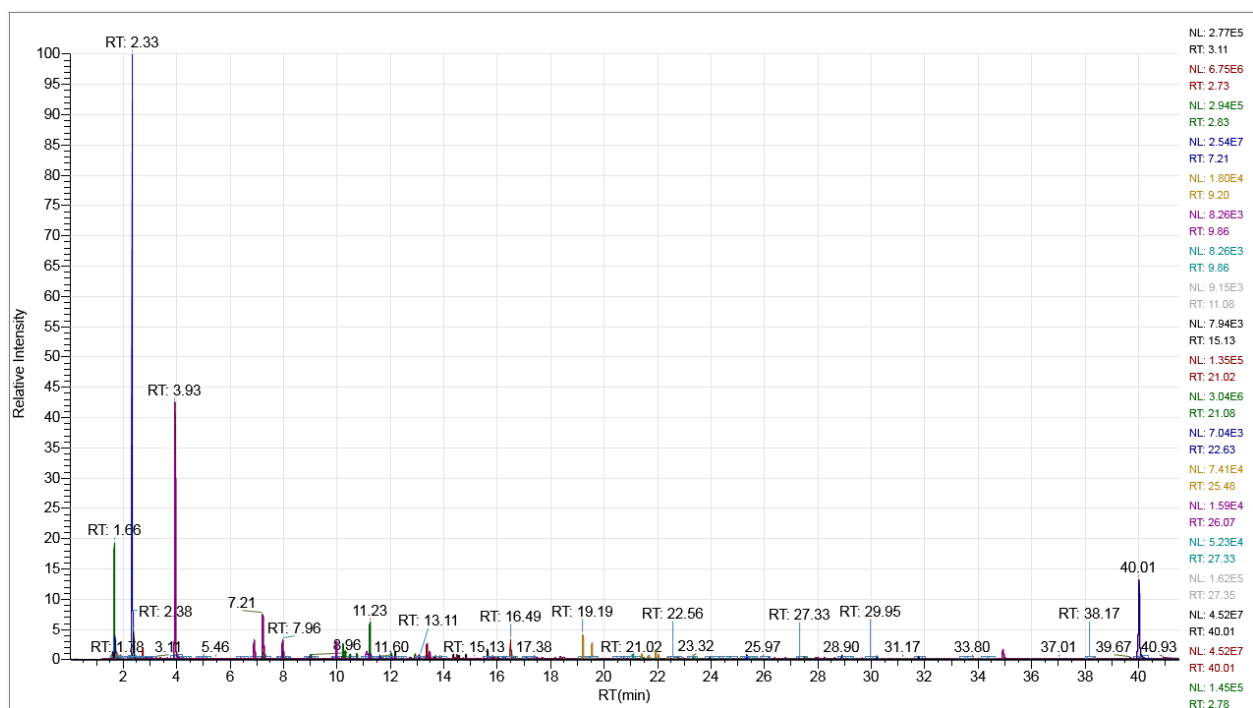

Figure S15. Reconstructed XIC chromatogram of the target analytes in air sample No. 15

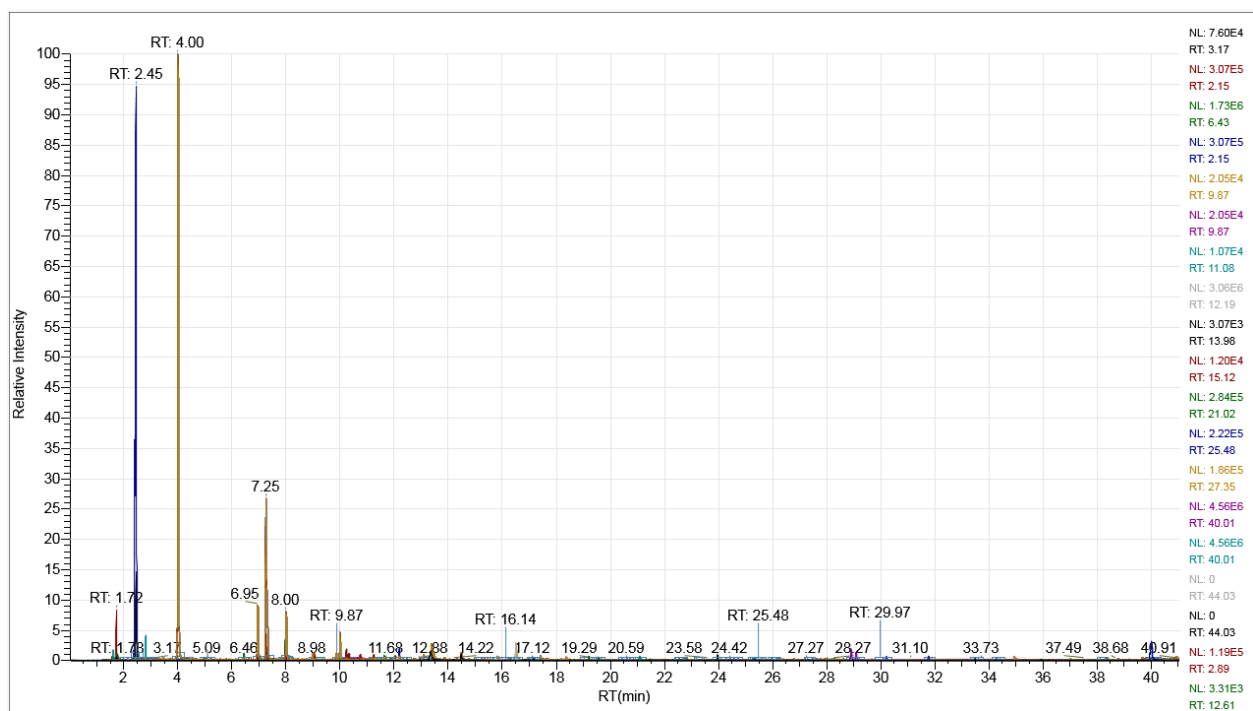

Figure S16. Reconstructed XIC chromatogram of the target analytes in air sample No. 16
